# Supplementary material for: The 2.1 Å Resolution Structure of Cyanopindolol-Bound β1-Adrenoceptor Identifies an Intramembrane Na+ Ion that Stabilises the Ligand-Free Receptor
Source: PLOS journal article supplement (doi:10.1371/journal.pone.0092727), 2014-03-24
Supplement: S2 (10.1371/journal.pone.0092727.s002) [file journal.pone.0092727.s002]

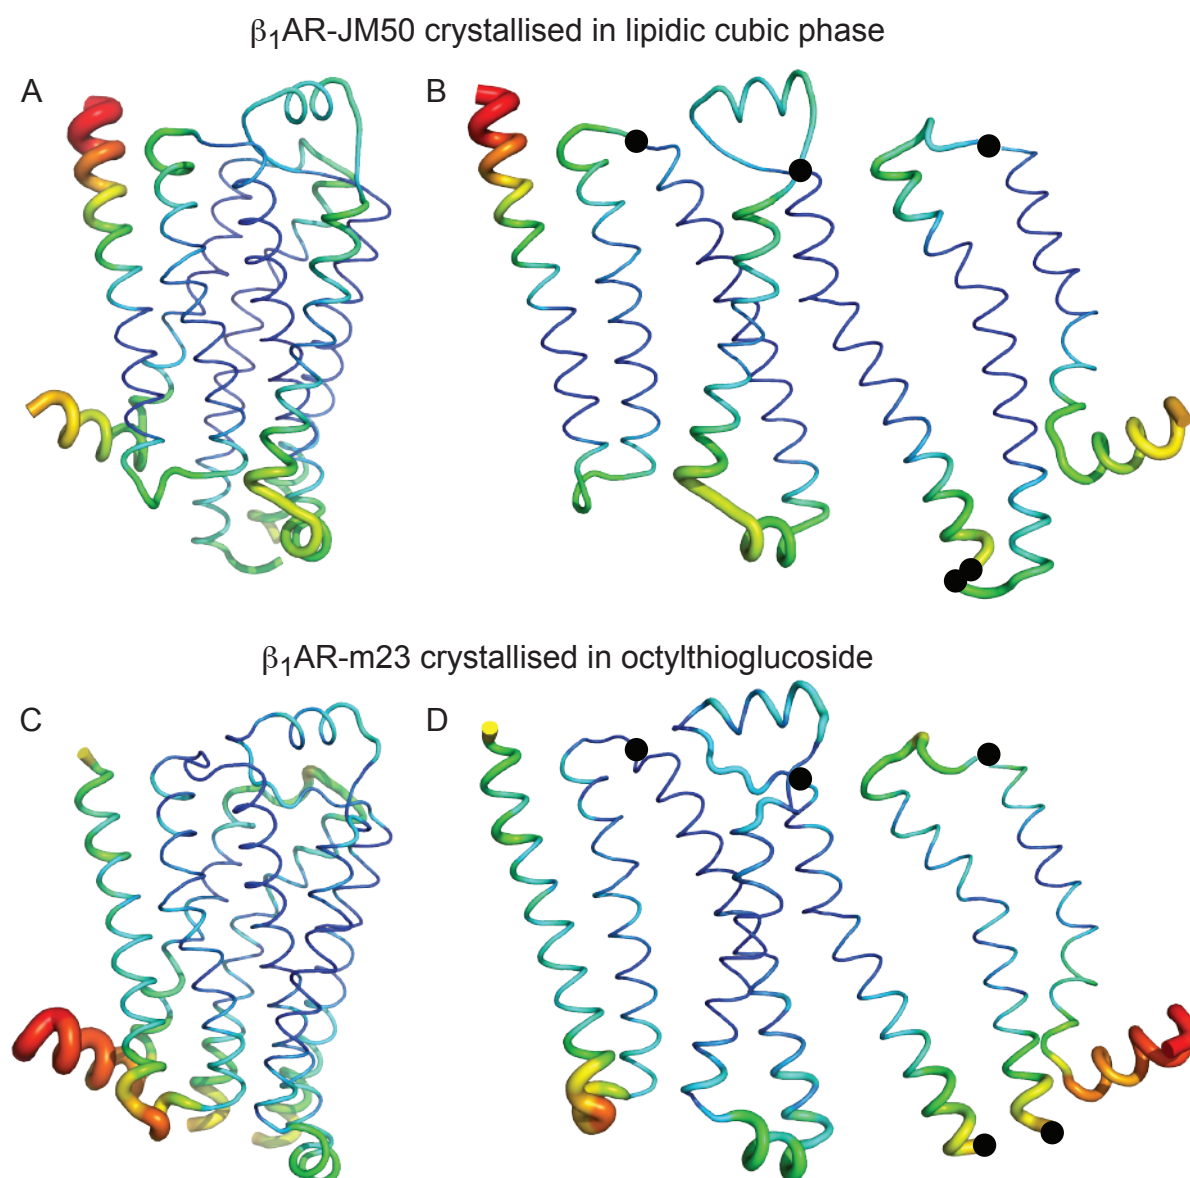

**Fig. S2.** Comparison of  $\beta_1$ AR-JM50 and  $\beta_1$ AR-m23 by B factor. B factors are indicated by the thickness of the ribbon and the rainbow colouration (thin & blue, low B factor; thick & red, high B factor); (A, B)  $\beta_1$ AR-JM50, (C, D)  $\beta_1$ AR-m23. Panels B and D depict the receptor in extended conformation where the black dots show the pivot points about which regions of the receptor were rotated.
