# Supplementary material for: The 2.1 Å Resolution Structure of Cyanopindolol-Bound β1-Adrenoceptor Identifies an Intramembrane Na+ Ion that Stabilises the Ligand-Free Receptor
Source: PLOS journal article supplement (doi:10.1371/journal.pone.0092727), 2014-03-24
Supplement: S3 (10.1371/journal.pone.0092727.s003) [file journal.pone.0092727.s003]

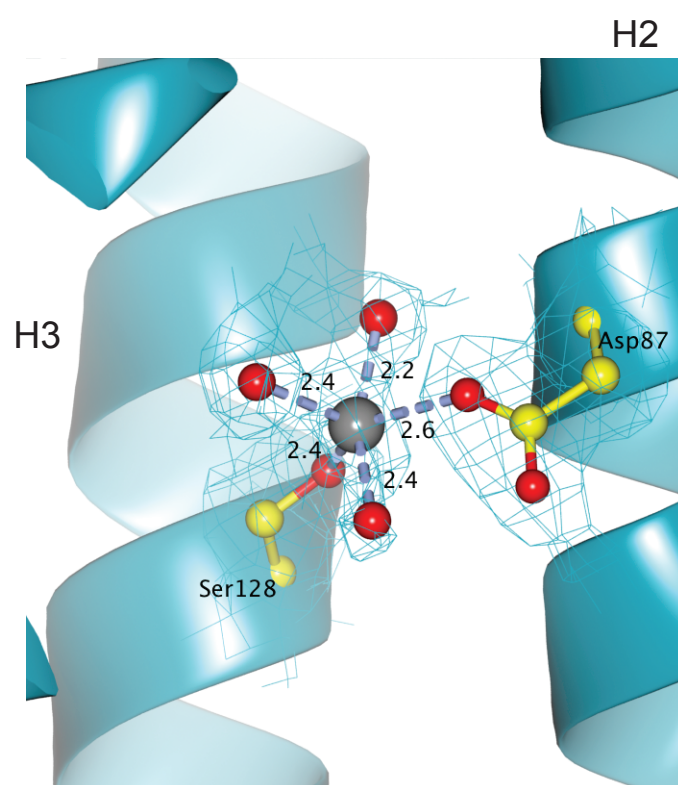

**Fig S3.** Coordination of the intra-membrane sodium ion in  $\beta 1$ -AR

The sodium ion (gray sphere) is coordinated by 3 water molecules (red spheres), the  $\gamma$ -hydroxyl of Ser128 and a carboxylate oxygen of Asp87. Helices H2 and H3 are shown in ribbon representation. 2Fo-Fc density (sharpened by a B factor of -20 and contoured at 1 Å) is shown for the two side chains, the sodium ion and the coordinating waters. Sodium coordination distances are in Å.
