# Supplementary material for: The 2.1 Å Resolution Structure of Cyanopindolol-Bound β1-Adrenoceptor Identifies an Intramembrane Na+ Ion that Stabilises the Ligand-Free Receptor
Source: PLOS journal article supplement (doi:10.1371/journal.pone.0092727), 2014-03-24
Supplement: S5 (10.1371/journal.pone.0092727.s005) [file journal.pone.0092727.s005]

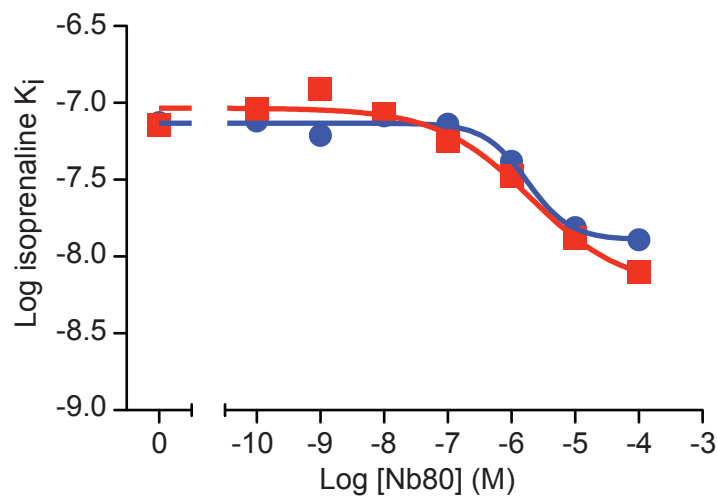

**Fig. S5.** The binding of the agonist isoprenaline to membrane-bound  $\beta_1$ AR was determined from competition binding curves using  $^3$ H-DHA under conditions of increasing concentrations of the nanobody Nb80 and in the absence (blue circles) or presence (red squares) of 150 mM NaCl.  $IC_{50}$  values were determined from a single experiment performed in duplicate and converted to  $K_i$  values as above. The  $EC_{50}$  for Nb80 was 1.77  $\mu$ M in the presence of 150 mM choline chloride and 2.0  $\mu$ M in the presence of 150 mM NaCl.
